# Supplementary material
Source: publisher figshare collection journal article supplement (https://gsapubs.figshare.com/articles/dataset/_/12540575)
Supplement: Supplementary file 1 [file 1]

Moecher, D.P., Kelly, E.M., Hietpas, J., and Samson, S.D., 2018, Proof of recycling in clastic sedimentary systems from textural analysis and geochronology of detrital monazite: Implications for detrital mineral provenance analysis: GSA Bulletin, <https://doi.org/10.1130/B31947.1>.

## **Data Repository**

APPENDIX 1. LOCATIONS FOR WALDEN CREEK GROUP SAMPLES

APPENDIX 2. SIMS Th-Pb MONAZITE GEOCHRONOLOGY

APPENDIX 3. LA-ICP-MS U-PB DETRITAL ZIRCON GEOCHRONOLOGY

APPENDIX 4. EPMA U-TH-PB CHEMICAL AGES

**APPENDIX 1: LOCATIONS FOR WALDEN CREEK GROUP SAMPLES**

| Sample     | Formation | Lithology                                                 | Latitude   | Longitude   | UTM             |              | Mineral Analyzed |
|------------|-----------|-----------------------------------------------------------|------------|-------------|-----------------|--------------|------------------|
| 5-1-2      | Wilhite   | poorly-sorted arkosic sandstone                           | 35 10' 28" | -84 25' 59" | 17S 187330.89mE | 3897788.56mN | monazite         |
| 5-2-1A     | Wilhite   | quartz-pebble conglomerate                                | 35 19' 30" | -84 17' 54" | 17S 200161.21mE | 3914078.74mN | monazite, zircon |
| Carter 5.1 | Wilhite   | subarkosic sandstone                                      | 35 36' 08" | -84 02' 58" | 17S 223744.89mE | 3944112.65mN | monazite, zircon |
| FL7        | Wilhite   | quartz-rich sandstone                                     | 35 30' 04" | -84 06' 51" | 17S 217524.82mE | 3933077.21mN | monazite, zircon |
| KS12-2C    | Wilhite   | very poorly sorted subarkosic sandstone with shale clasts | 35 44' 20" | -83 45' 38" | 17S 250349.17mE | 3958502.47mN | zircon           |
| PF12-1     | Shields   | poorly sorted feldspathic sandstone                       | 35 45' 40" | -83 37' 18" | 17S 262978.42mE | 3960623.05mN | zircon, monazite |
| WC12-2A    | Shields   | quartz-rich poorly sorted angular sandstone               | 35 42' 59" | -83 40' 19" | 17S 258296.57mE | 3955784.02mN | zircon           |
| WCK12-1    | Sandsuck  | quartz-pebble conglomerate                                | 35 48' 13" | -83 39' 13" | 17S 260217.49mE | 3965416.13mN | zircon, monazite |

## APPENDIX 2. SIMS Th-Pb MONAZITE GEOCHRONOLOGY

| Analysis                        | Age (Ma)        |           |                |        |
|---------------------------------|-----------------|-----------|----------------|--------|
|                                 | 208Pb/<br>232Th | ±<br>(Ma) | 208*/<br>232Th | ±<br>% |
| <b>5-2-1A Wilhite Fm.</b>       |                 |           |                |        |
| 2013_09_26Sep\ Big_mnz@45.ais   | 983             | 19        | 0.049841       | 1.9    |
| 2013_09_26Sep\ Big_mnz@46.ais   | 1013            | 22        | 0.051395       | 2.1    |
| 2013_09_26Sep\ Big_mnz@47.ais   | 1011            | 21        | 0.051291       | 2.0    |
| 2013_09_27Sep\ small_mnz@43.ais | 1021            | 20        | 0.051812       | 1.9    |
| 2013_09_27Sep\ small_mnz@45.ais | 979             | 19        | 0.049602       | 1.9    |
| 2013_09_27Sep\ small_mnz@46.ais | 1172            | 23        | 0.059699       | 1.9    |
| 2013_09_27Sep\ small_mnz@47.ais | 1152            | 22        | 0.058651       | 1.8    |
| 2013_09_27Sep\ small_mnz@48.ais | 1132            | 22        | 0.057604       | 1.9    |
| <b>5-1-2 Wilhite Fm.</b>        |                 |           |                |        |
| 2013_09_26Sep\ Big_mnz@78.ais   | 477             | 9         | 0.023880       | 1.9    |
| 2013_09_26Sep\ Big_mnz@81.ais   | 472             | 9         | 0.023627       | 1.9    |
| 2013_09_26Sep\ Big_mnz@85.ais   | 487             | 13        | 0.024367       | 2.6    |
| 2013_09_26Sep\ Big_mnz@86.ais   | 479             | 10        | 0.023956       | 2.0    |
| 2013_09_26Sep\ Big_mnz@95.ais   | 493             | 12        | 0.024666       | 2.3    |
| 2013_09_27Sep\ small_mnz@25.ais | 514             | 16        | 0.025741       | 3.1    |
| 2013_09_27Sep\ small_mnz@28.ais | 1031            | 21        | 0.052332       | 1.9    |
| <b>Carter 5.1 Wilhite Fm.</b>   |                 |           |                |        |
| 2013_09_26Sep\ Big_mnz@55.ais   | 486             | 15        | 0.024336       | 3.0    |
| 2013_09_26Sep\ Big_mnz@56.ais   | 513             | 16        | 0.025690       | 3.2    |
| 2013_09_26Sep\ Big_mnz@58.ais   | 452             | 8         | 0.022599       | 1.9    |
| 2013_09_26Sep\ Big_mnz@61.ais   | 543             | 19        | 0.027219       | 3.4    |
| 2013_09_26Sep\ Big_mnz@62.ais   | 456             | 9         | 0.022832       | 1.9    |
| 2013_09_26Sep\ Big_mnz@65.ais   | 454             | 9         | 0.022731       | 1.9    |
| 2013_09_26Sep\ Big_mnz@66.ais   | 516             | 17        | 0.025863       | 3.3    |
| 2013_09_26Sep\ Big_mnz@69.ais   | 431             | 8         | 0.021563       | 1.9    |
| 2013_09_26Sep\ Big_mnz@70.ais   | 465             | 9         | 0.023267       | 1.9    |
| 2013_09_26Sep\ Big_mnz@71.ais   | 507             | 15        | 0.025381       | 3.0    |
| 2013_09_26Sep\ Big_mnz@72.ais   | 450             | 9         | 0.022503       | 1.9    |
| 2013_09_27Sep\ small_mnz@31.ais | 448             | 8         | 0.022432       | 1.8    |
| 2013_09_27Sep\ small_mnz@35.ais | 456             | 8         | 0.022837       | 1.7    |
| 2013_09_27Sep\ small_mnz@36.ais | 458             | 8         | 0.022918       | 1.7    |
| 2013_09_27Sep\ small_mnz@37.ais | 1054            | 20        | 0.053530       | 1.8    |
| 2013_09_27Sep\ small_mnz@38.ais | 462             | 9         | 0.023105       | 1.9    |
| 2013_09_27Sep\ small_mnz@41.ais | 458             | 8         | 0.022938       | 1.7    |
| <b>FL7 Wilhite Fm.</b>          |                 |           |                |        |
| 2013_09_26Sep\ Big_mnz@1.ais    | 1018            | 18.5      | 0.051655       | 1.8    |
| 2013_09_26Sep\ Big_mnz@10.ais   | 992.6           | 21.3      | 0.050335       | 2.1    |
| 2013_09_26Sep\ Big_mnz@11.ais   | 1028            | 22.4      | 0.052176       | 2.1    |
| 2013_09_26Sep\ Big_mnz@2.ais    | 1122            | 21        | 0.057081       | 1.8    |
| 2013_09_26Sep\ Big_mnz@3.ais    | 1019            | 23.1      | 0.051707       | 2.2    |

|                |                  |        |      |          |     |
|----------------|------------------|--------|------|----------|-----|
| 2013_09_26Sep\ | Big_mnz@4.ais    | 1063   | 23.2 | 0.053999 | 2.1 |
| 2013_09_26Sep\ | Big_mnz@5.ais    | 1126   | 23.8 | 0.057290 | 2.1 |
| 2013_09_26Sep\ | Big_mnz@6.ais    | 921.4  | 20.2 | 0.046641 | 2.1 |
| 2013_09_26Sep\ | Big_mnz@7.ais    | 1017   | 19.4 | 0.051603 | 1.9 |
| 2013_09_26Sep\ | Big_mnz@8.ais    | 1164   | 24.7 | 0.059279 | 2.1 |
| 2013_09_26Sep\ | Big_mnz@9.ais    | 1062   | 22.7 | 0.053947 | 2.1 |
| 2013_09_27Sep\ | small_mnz@1.ais  | 1041.0 | 16.6 | 0.052853 | 1.6 |
| 2013_09_27Sep\ | small_mnz@10.ais | 1089.0 | 22.1 | 0.055356 | 2.0 |
| 2013_09_27Sep\ | small_mnz@11.ais | 1067.0 | 23.4 | 0.054208 | 2.1 |
| 2013_09_27Sep\ | small_mnz@12.ais | 1146.0 | 20.6 | 0.058337 | 1.7 |
| 2013_09_27Sep\ | small_mnz@13.ais | 1106.0 | 20.6 | 0.056244 | 1.8 |
| 2013_09_27Sep\ | small_mnz@14.ais | 1162.0 | 25.0 | 0.059175 | 2.1 |
| 2013_09_27Sep\ | small_mnz@15.ais | 1036.0 | 19.8 | 0.052592 | 1.9 |
| 2013_09_27Sep\ | small_mnz@16.ais | 971.4  | 19.7 | 0.049234 | 2.0 |
| 2013_09_27Sep\ | small_mnz@18.ais | 991.6  | 16.5 | 0.050283 | 1.6 |
| 2013_09_27Sep\ | small_mnz@19.ais | 1061.0 | 22.4 | 0.053895 | 2.1 |
| 2013_09_27Sep\ | small_mnz@2.ais  | 1100.0 | 18.1 | 0.055931 | 1.6 |
| 2013_09_27Sep\ | small_mnz@3.ais  | 1147.0 | 23.3 | 0.058389 | 2.0 |
| 2013_09_27Sep\ | small_mnz@4.ais  | 1019.0 | 20.3 | 0.051707 | 1.9 |
| 2013_09_27Sep\ | small_mnz@5.ais  | 1043.0 | 21.4 | 0.052957 | 2.0 |
| 2013_09_27Sep\ | small_mnz@6.ais  | 942.5  | 13.8 | 0.047734 | 1.4 |
| 2013_09_27Sep\ | small_mnz@8.ais  | 1141.0 | 21.8 | 0.058075 | 1.9 |
| 2013_09_27Sep\ | small_mnz@9.ais  | 1002.0 | 19.2 | 0.050823 | 1.9 |

---

**PF 12-1 Shields Fm.**

---

|                |                  |        |      |          |     |
|----------------|------------------|--------|------|----------|-----|
| 2013_09_26Sep\ | Big_mnz@12.ais   | 1000   | 19.3 | 0.050719 | 1.9 |
| 2013_09_26Sep\ | Big_mnz@13.ais   | 998.5  | 22.9 | 0.050641 | 2.2 |
| 2013_09_26Sep\ | Big_mnz@24.ais   | 999.6  | 21.5 | 0.050699 | 2.1 |
| 2013_09_26Sep\ | Big_mnz@27.ais   | 1050   | 22.9 | 0.053322 | 2.1 |
| 2013_09_26Sep\ | Big_mnz@29.ais   | 1001   | 19.9 | 0.050771 | 1.9 |
| 2013_09_26Sep\ | Big_mnz@30.ais   | 1132   | 19.9 | 0.057604 | 1.7 |
| 2013_09_26Sep\ | Big_mnz@31.ais   | 1024   | 20.8 | 0.051968 | 2.0 |
| 2013_09_27Sep\ | small_mnz@51.ais | 1061.0 | 22.2 | 0.053895 | 2.0 |
| 2013_09_27Sep\ | small_mnz@52.ais | 1003.0 | 19.1 | 0.050875 | 1.9 |
| 2013_09_27Sep\ | small_mnz@54.ais | 1039.0 | 19.4 | 0.052749 | 1.8 |
| 2013_09_27Sep\ | small_mnz@55.ais | 977.2  | 16.7 | 0.049535 | 1.7 |
| 2013_09_27Sep\ | small_mnz@56.ais | 1203.0 | 21.4 | 0.061325 | 1.7 |

---

**WCK12-1 Sandsuck Fm.**

---

|                |                  |        |      |          |     |
|----------------|------------------|--------|------|----------|-----|
| 2013_09_26Sep\ | Big_mnz@34.ais   | 1013   | 19   | 0.051395 | 1.8 |
| 2013_09_26Sep\ | Big_mnz@35.ais   | 1061   | 29.5 | 0.053895 | 2.7 |
| 2013_09_26Sep\ | Big_mnz@39.ais   | 1212   | 46.4 | 0.061798 | 3.7 |
| 2013_09_27Sep\ | small_mnz@60.ais | 1030.0 | 19.2 | 0.052280 | 1.8 |
| 2013_09_27Sep\ | small_mnz@63.ais | 1023.0 | 20.9 | 0.051916 | 2.0 |
| 2013_09_27Sep\ | small_mnz@64.ais | 974.3  | 18.4 | 0.049384 | 1.8 |
| 2013_09_27Sep\ | small_mnz@65.ais | 1031.0 | 17.9 | 0.052332 | 1.7 |

| 5-1-2                          |          |                 |                 |               |               |              |                         |              |                |                |                |          |          |                      |          |                |       |        |                          |           |           |                  |                    |           |                |            |                    |                          |                    |
|--------------------------------|----------|-----------------|-----------------|---------------|---------------|--------------|-------------------------|--------------|----------------|----------------|----------------|----------|----------|----------------------|----------|----------------|-------|--------|--------------------------|-----------|-----------|------------------|--------------------|-----------|----------------|------------|--------------------|--------------------------|--------------------|
| SAMPLE                         | m1 hi Th | m1 low Th lower | m1 low Th upper | m3 low Y left | m3 hi Y right | m3 higher Th | m3 hi Th rim upper left | m4 higher Th | m4 low Th left | m6 hi Th right | m6 low Th left | 5-1-2 m2 | 5-1-2 m7 | 5-1-2 m8 upper right | 5-1-2 m9 | m10 upper left | m11   | m12    | m14 higher Th lower left | m14 upper | m15 upper | m16 hi Th middle | m16 lower Th right | m16 lower | m17 hi Th core | m17 low Th | m17 hi Th rim left | m8 hi Th rim upper right | m10 hi Th rim left |
| n                              |          |                 |                 |               |               |              |                         |              |                |                |                |          |          |                      |          |                |       |        |                          |           |           |                  |                    |           |                |            |                    |                          |                    |
| U WT%                          | 0.036    | 0.021           | 0.098           | 0.061         | 0.055         | 0.018        | 0.021                   | 0.043        | 0.022          | 0.050          | 0.022          | 0.047    | 0.026    | 0.054                | 0.060    | 0.033          | 0.049 | 0.067  | 0.042                    | 0.043     | 0.038     | 0.030            | 0.040              | 0.052     | 0.038          | 0.022      | 0.045              | 0.030                    | 0.038              |
| Th WT%                         | 5.90     | 0.69            | 1.38            | 0.02          | 1.70          | 5.37         | 1.51                    | 6.41         | 2.70           | 4.64           | 1.67           | 3.18     | 0.29     | 1.88                 | 1.56     | 2.00           | 7.75  | 2.80   | 2.61                     | 1.38      | 2.38      | 7.71             | 3.77               | 3.10      | 4.16           | 0.43       | 1.63               | 1.73                     | 2.37               |
| Pb WT%                         | 0.132    | 0.014           | 0.036           | 0.004         | 0.044         | 0.121        | 0.025                   | 0.147        | 0.055          | 0.103          | 0.039          | 0.080    | 0.009    | 0.048                | 0.038    | 0.048          | 0.180 | 0.067  | 0.056                    | 0.034     | 0.051     | 0.174            | 0.091              | 0.069     | 0.090          | 0.011      | 0.036              | 0.037                    | 0.053              |
| U PPM                          | 361      | 206             | 984             | 613           | 545           | 175          | 208                     | 425          | 221            | 502            | 224            | 473      | 255      | 543                  | 597      | 330            | 492   | 672    | 420                      | 429       | 382       | 295              | 397                | 516       | 379            | 219        | 450                | 299                      | 380                |
| Th PPM                         | 58985    | 6943            | 13833           | 166           | 16952         | 53683        | 15122                   | 64085        | 26996          | 46440          | 16731          | 31810    | 2926     | 18781                | 15608    | 20005          | 77465 | 28044  | 26090                    | 13843     | 23830     | 77135            | 37675              | 30952     | 41626          | 4262       | 16273              | 17318                    | 23699              |
| Pb PPM                         | 1316     | 137             | 362             | 44            | 436           | 1208         | 250                     | 1473         | 553            | 1033           | 387            | 798      | 87       | 480                  | 382      | 482            | 1797  | 673    | 564                      | 336       | 514       | 1737             | 914                | 695       | 900            | 113        | 361                | 369                      | 527                |
| %Pb(Th) <sup>1</sup>           | 98.1     | 90.6            | 75.4            | 7.7           | 81.4          | 98.9         | 95.8                    | 97.8         | 97.4           | 96.5           | 95.7           | 93.0     | 77.1     | 90.8                 | 88.9     | 94.9           | 98.0  | 92.2   | 94.6                     | 90.6      | 94.8      | 98.8             | 96.7               | 94.8      | 97.1           | 85.2       | 90.5               | 94.6                     | 95.0               |
| %Pb(U) <sup>1</sup>            | 1.9      | 9.4             | 24.5            | 92.3          | 18.5          | 1.1          | 4.2                     | 2.2          | 2.6            | 3.5            | 4.2            | 7.0      | 22.9     | 9.2                  | 11.1     | 5.1            | 2.0   | 7.8    | 5.4                      | 9.3       | 5.2       | 1.2              | 3.3                | 5.2       | 2.9            | 14.8       | 9.5                | 5.4                      | 5.0                |
| Age (m.y.) <sup>2</sup>        | 488      | 449             | 508             | 454           | 520           | 492          | 356                     | 502          | 441            | 477            | 490            | 539      | 512      | 518                  | 486      | 508            | 506   | 495    | 453                      | 492       | 453       | 495              | 521                | 478       | 468            | 506        | 455                | 448                      | 471                |
| Std. Dev. (m.y.)               | 17       | 9               | 24              | 58            | 18            | 21           | 18                      | 21           | 21             | 11             | 30             | 27       | 26       | 24                   | 28       | 11             | 6     | 17     | 34                       | 42        | 36        | 21               | 24                 | 15        | 9              | 14         | 6                  | 20                       | 43                 |
| UO <sub>2</sub>                | 0.041    | 0.023           | 0.112           | 0.070         | 0.062         | 0.020        | 0.024                   | 0.048        | 0.025          | 0.057          | 0.025          | 0.054    | 0.029    | 0.062                | 0.068    | 0.037          | 0.056 | 0.076  | 0.048                    | 0.049     | 0.043     | 0.033            | 0.045              | 0.058     | 0.043          | 0.025      | 0.051              | 0.034                    | 0.043              |
| K <sub>2</sub> O               | 0.01     | 0.05            | 0.02            | 0.01          | 0.01          | 0.01         | 0.05                    | 0.05         | 0.06           | 0.01           | 0.00           | 0.01     | 0.01     | 0.02                 | 0.05     | 0.01           | 0.01  | 0.01   | 0.03                     | 0.01      | 0.04      | 0.00             | 0.01               | 0.01      | 0.00           | 0.01       | 0.04               | 0.07                     | 0.07               |
| ThO <sub>2</sub>               | 6.71     | 0.79            | 1.57            | 0.02          | 1.93          | 6.11         | 1.72                    | 7.29         | 3.07           | 5.28           | 1.90           | 3.62     | 0.33     | 2.14                 | 1.78     | 2.28           | 8.81  | 3.19   | 2.97                     | 1.58      | 2.71      | 8.78             | 4.29               | 3.52      | 4.74           | 0.49       | 1.85               | 1.97                     | 2.70               |
| CaO                            | 1.05     | 0.34            | 0.46            | 0.05          | 0.49          | 1.02         | 0.20                    | 1.05         | 0.41           | 0.99           | 0.49           | 0.74     | 0.27     | 0.52                 | 0.43     | 0.59           | 1.51  | 0.66   | 0.62                     | 0.53      | 0.63      | 1.42             | 1.02               | 0.71      | 0.98           | 0.29       | 0.29               | 0.28                     | 0.37               |
| SO <sub>3</sub>                | 0.27     | 0.42            | 0.30            | 0.07          | 0.19          | 0.15         | 0.02                    | 0.19         | 0.01           | 0.23           | 0.42           | 0.34     | 0.38     | 0.19                 | 0.25     | 0.46           | 0.23  | 0.28   | 0.32                     | 0.26      | 0.29      | 0.25             | 0.76               | 0.25      | 0.36           | 0.37       | 0.04               | 0.02                     | 0.02               |
| P <sub>2</sub> O <sub>5</sub>  | 27.17    | 29.23           | 28.08           | 30.24         | 29.06         | 26.40        | 30.48                   | 29.05        | 29.38          | 28.47          | 29.46          | 28.22    | 30.01    | 29.21                | 29.69    | 29.31          | 24.64 | 29.44  | 29.48                    | 29.60     | 28.95     | 24.36            | 25.56              | 29.73     | 27.66          | 30.00      | 29.94              | 26.85                    | 29.71              |
| Y <sub>2</sub> O <sub>3</sub>  | 0.44     | 0.26            | 0.69            | 0.42          | 0.69          | 0.46         | 0.23                    | 0.41         | 0.33           | 0.63           | 0.29           | 0.46     | 0.25     | 0.77                 | 0.52     | 0.39           | 0.55  | 0.58   | 0.46                     | 0.86      | 0.57      | 0.51             | 0.34               | 0.76      | 0.64           | 0.27       | 0.46               | 0.23                     | 0.43               |
| SrO                            | 0.44     | 0.26            | 0.17            | 0.02          | 0.20          | 0.28         | 0.07                    | 0.48         | 0.04           | 0.45           | 0.34           | 0.50     | 0.20     | 0.27                 | 0.19     | 0.39           | 0.56  | 0.30   | 0.27                     | 0.30      | 0.32      | 0.54             | 0.71               | 0.42      | 0.46           | 0.22       | 0.07               | 0.10                     | 0.08               |
| SiO <sub>2</sub>               | 0.21     | 0.07            | 0.06            | 0.05          | 0.07          | 0.18         | 0.12                    | 0.23         | 0.23           | 0.11           | 0.04           | 0.17     | 0.05     | 0.07                 | 0.08     | 0.05           | 0.28  | 0.15   | 0.12                     | 0.08      | 0.10      | 0.34             | 0.10               | 0.09      | 0.14           | 0.02       | 0.12               | 0.22                     | 0.29               |
| PbO                            | 0.142    | 0.015           | 0.039           | 0.005         | 0.047         | 0.130        | 0.027                   | 0.159        | 0.060          | 0.111          | 0.042          | 0.086    | 0.009    | 0.052                | 0.041    | 0.052          | 0.194 | 0.072  | 0.061                    | 0.036     | 0.055     | 0.187            | 0.098              | 0.075     | 0.097          | 0.012      | 0.039              | 0.040                    | 0.057              |
| La <sub>2</sub> O <sub>3</sub> | 8.56     | 19.99           | 10.12           | 11.30         | 6.91          | 4.32         | 14.02                   | 10.76        | 13.68          | 8.42           | 12.10          | 9.97     | 15.39    | 9.82                 | 13.32    | 11.95          | 6.88  | 8.69   | 10.38                    | 7.15      | 12.54     | 6.16             | 9.09               | 12.18     | 6.67           | 14.41      | 13.07              | 14.36                    | 13.73              |
| Ce <sub>2</sub> O <sub>3</sub> | 28.76    | 33.25           | 32.13           | 34.05         | 27.59         | 21.80        | 29.17                   | 29.79        | 26.88          | 27.94          | 33.68          | 30.89    | 35.37    | 30.30                | 31.64    | 33.49          | 25.89 | 30.69  | 29.52                    | 28.21     | 30.56     | 25.79            | 31.55              | 31.70     | 27.11          | 35.90      | 28.30              | 28.61                    | 27.47              |
| Nd <sub>2</sub> O <sub>3</sub> | 16.68    | 10.30           | 17.39           | 17.77         | 22.00         | 23.86        | 16.26                   | 14.22        | 15.93          | 17.99          | 15.64          | 17.35    | 13.65    | 18.89                | 15.22    | 15.32          | 18.23 | 18.63  | 18.16                    | 22.41     | 16.60     | 19.34            | 18.69              | 15.30     | 20.75          | 14.60      | 16.86              | 15.82                    | 15.90              |
| Pr <sub>2</sub> O <sub>3</sub> | 3.83     | 2.93            | 4.12            | 4.16          | 4.39          | 4.10         | 3.46                    | 3.54         | 3.24           | 3.87           | 3.91           | 4.00     | 3.65     | 4.01                 | 3.53     | 3.80           | 3.82  | 4.11   | 3.88                     | 4.38      | 3.66      | 3.94             | 4.26               | 3.63      | 4.29           | 3.92       | 3.56               | 3.39                     | 3.30               |
| Eu <sub>2</sub> O <sub>3</sub> | 0.43     | 0.25            | 0.51            | 0.50          | 0.79          | 1.02         | 0.73                    | 0.36         | 0.66           | 0.53           | 0.37           | 0.48     | 0.34     | 0.64                 | 0.53     | 0.38           | 0.55  | 0.51   | 0.62                     | 0.73      | 0.48      | 0.56             | 0.51               | 0.45      | 0.64           | 0.24       | 0.71               | 0.72                     | 0.69               |
| Sm <sub>2</sub> O <sub>3</sub> | 2.27     | 1.10            | 2.55            | 2.51          | 3.86          | 5.46         | 3.72                    | 1.86         | 3.91           | 2.77           | 1.84           | 2.36     | 1.50     | 3.09                 | 2.67     | 1.81           | 2.98  | 2.72   | 3.15                     | 3.91      | 2.47      | 3.03             | 2.58               | 2.24      | 3.42           | 1.58       | 3.94               | 3.62                     | 3.94               |
| Dy <sub>2</sub> O <sub>3</sub> | 0.13     | 0.05            | 0.17            | 0.12          | 0.31          | 0.25         | 0.15                    | 0.08         | 0.24           | 0.20           | 0.07           | 0.11     | 0.05     | 0.23                 | 0.19     | 0.10           | 0.20  | 0.13   | 0.19                     | 0.23      | 0.12      | 0.11             | 0.11               | 0.15      | 0.21           | 0.00       | 0.29               | 0.17                     | 0.27               |
| Er <sub>2</sub> O <sub>3</sub> | 0.03     | 0.03            | 0.09            | 0.05          | 0.03          | bd           | 0.00                    | 0.04         | 0.02           | 0.07           | 0.02           | 0.06     | 0.02     | 0.09                 | 0.04     | 0.03           | 0.08  | 0.05   | 0.03                     | 0.07      | 0.02      | 0.04             | 0.04               | 0.04      | 0.03           | 0.01       | 0.03               | bd                       | 0.04               |
| Gd <sub>2</sub> O <sub>3</sub> | 0.61     | 0.28            | 0.77            | 0.70          | 1.44          | 2.18         | 1.81                    | 0.55         | 1.89           | 0.88           | 0.43           | 0.70     | 0.35     | 1.05                 | 1.15     | 0.50           | 1.00  | 0.78   | 1.22                     | 1.23      | 0.73      | 0.85             | 0.68               | 0.71      | 1.01           | 0.38       | 2.01               | 1.90                     | 2.13               |
| Total                          | 97.79    | 99.64           | 99.36           | 102.11        | 100.06        | 97.75        | 102.26                  | 100.17       | 100.08         | 99.02          | 101.10         | 100.11   | 101.85   | 101.41               | 101.38   | 100.93         | 96.48 | 101.06 | 101.51                   | 101.61    | 100.88    | 96.23            | 100.45             | 102.02    | 99.24          | 102.74     | 101.68             | 98.40                    | 101.23             |

| SAMPLE                         | 38Q6              |                        |                    |           |                  |          |                       |           |                  |          |          |           |           |           |           |           |           |
|--------------------------------|-------------------|------------------------|--------------------|-----------|------------------|----------|-----------------------|-----------|------------------|----------|----------|-----------|-----------|-----------|-----------|-----------|-----------|
|                                | m2 hi Th<br>lower | m2 mid Th<br>left side | m2 low Th<br>right | m3 middle | m3 upper<br>left | m3 lower | m3 hi Th rim<br>lower | m4 middle | m4 upper<br>area | m1 lower | m1 lower | m6 area 1 | m6 area 2 | m6 area 3 | m7 area 1 | m7 area 2 | m7 area 3 |
| n                              |                   |                        |                    |           |                  |          |                       |           |                  |          |          |           |           |           |           |           |           |
| U WT%                          | 0.029             | 0.205                  | 0.055              | 0.161     | 0.128            | 0.076    | 0.028                 | 0.622     | 0.558            | 0.122    | 0.124    | 0.066     | 0.049     | 0.040     | 0.079     | 0.057     | 0.052     |
| Th WT%                         | 8.01              | 1.60                   | 0.85               | 1.29      | 0.91             | 0.93     | 2.72                  | 7.56      | 6.86             | 3.38     | 3.23     | 2.12      | 2.40      | 1.60      | 1.55      | 1.66      | 1.50      |
| Pb WT%                         | 0.165             | 0.047                  | 0.019              | 0.041     | 0.028            | 0.025    | 0.059                 | 0.457     | 0.413            | 0.189    | 0.196    | 0.054     | 0.056     | 0.039     | 0.037     | 0.039     | 0.034     |
| U PPM                          | 294               | 2052                   | 554                | 1612      | 1281             | 757      | 282                   | 6225      | 5580             | 1215     | 1238     | 665       | 486       | 401       | 794       | 565       | 517       |
| Th PPM                         | 80059             | 16037                  | 8523               | 12868     | 9058             | 9338     | 27242                 | 75566     | 68574            | 33775    | 32295    | 21218     | 23959     | 15957     | 15499     | 16567     | 15006     |
| Pb PPM                         | 1653              | 466                    | 187                | 408       | 280              | 251      | 593                   | 4566      | 4126             | 1891     | 1958     | 537       | 561       | 391       | 370       | 388       | 343       |
| %Pb(Th) <sup>1</sup>           | 98.8              | 70.5                   | 82.5               | 70.9      | 67.7             | 79.1     | 96.5                  | 78.1      | 78.3             | 89.0     | 88.3     | 87.1      | 93.6      | 91.8      | 85.7      | 89.9      | 89.7      |
| %Pb(U) <sup>1</sup>            | 1.2               | 29.5                   | 17.5               | 29.1      | 32.3             | 20.9     | 3.5                   | 21.9      | 21.7             | 11.0     | 11.7     | 12.9      | 6.4       | 8.2       | 14.2      | 10.1      | 10.2      |
| Age (m.y.) <sup>2</sup>        | 455               | 458                    | 406                | 502       | 472              | 473      | 468                   | 1036      | 1034             | 1094     | 1173     | 509       | 491       | 498       | 454       | 467       | 455       |
| Std. Dev. (m.y.)               | 24                | 18                     | 35                 | 25        | 32               | 38       | 15                    | 14        | 20               | 11       | 23       | 24        | 10        | 19        | 21        | 23        | 31        |
| UO <sub>2</sub>                | 0.033             | 0.233                  | 0.063              | 0.183     | 0.145            | 0.086    | 0.032                 | 0.706     | 0.633            | 0.138    | 0.140    | 0.075     | 0.055     | 0.046     | 0.090     | 0.064     | 0.059     |
| K <sub>2</sub> O               | 0.03              | 0.00                   | 0.00               | 0.00      | 0.00             | 0.00     | 0.03                  | 0.00      | 0.00             | 0.00     | 0.00     | 0.04      | 0.04      | 0.03      | 0.02      | 0.03      | 0.03      |
| ThO <sub>2</sub>               | 9.11              | 1.82                   | 0.97               | 1.46      | 1.03             | 1.06     | 3.10                  | 8.60      | 7.80             | 3.84     | 3.67     | 2.41      | 2.73      | 1.82      | 1.76      | 1.89      | 1.71      |
| CaO                            | 0.54              | 0.29                   | 0.25               | 0.17      | 0.16             | 0.05     | 0.21                  | 0.73      | 0.68             | 0.11     | 0.10     | 0.13      | 0.23      | 0.21      | 0.18      | 0.13      | 0.12      |
| SO <sub>3</sub>                | 0.01              | 0.01                   | 0.01               | 0.02      | 0.01             | 0.01     | 0.01                  | 0.01      | 0.02             | 0.02     | 0.02     | 0.02      | 0.01      | 0.02      | 0.01      | 0.02      | 0.01      |
| P <sub>2</sub> O <sub>5</sub>  | 27.19             | 29.42                  | 29.66              | 29.78     | 29.52            | 29.99    | 29.38                 | 27.61     | 28.11            | 28.08    | 28.52    | 29.25     | 29.57     | 30.09     | 30.01     | 30.06     | 29.99     |
| Y <sub>2</sub> O <sub>3</sub>  | 0.28              | 0.79                   | 0.79               | 0.75      | 0.81             | 0.68     | 0.33                  | 1.28      | 1.22             | 1.32     | 1.36     | 0.54      | 0.54      | 0.53      | 0.55      | 0.44      | 0.41      |
| SrO                            | 1.95              | 0.65                   | 0.52               | 0.50      | 0.42             | 0.22     | 0.75                  | 0.01      | 0.01             | 0.01     | bd       | 0.52      | 0.65      | 0.70      | 0.41      | 0.48      | 0.44      |
| SiO <sub>2</sub>               | 0.33              | 0.07                   | 0.06               | 0.05      | 0.05             | 0.03     | 0.11                  | 1.09      | 0.98             | 0.75     | 0.82     | 0.11      | 0.13      | 0.11      | 0.07      | 0.07      | 0.09      |
| PbO                            | 0.178             | 0.050                  | 0.020              | 0.044     | 0.030            | 0.027    | 0.064                 | 0.492     | 0.444            | 0.204    | 0.211    | 0.058     | 0.060     | 0.042     | 0.040     | 0.042     | 0.037     |
| La <sub>2</sub> O <sub>3</sub> | 9.49              | 4.79                   | 5.07               | 9.09      | 9.89             | 9.25     | 11.28                 | 12.04     | 12.45            | 9.73     | 9.71     | 9.69      | 8.73      | 11.62     | 7.43      | 12.07     | 10.83     |
| Ce <sub>2</sub> O <sub>3</sub> | 30.68             | 25.11                  | 26.25              | 32.32     | 32.69            | 33.41    | 34.34                 | 28.16     | 28.51            | 29.10    | 28.84    | 33.30     | 32.64     | 34.92     | 31.24     | 34.65     | 34.63     |
| Nd <sub>2</sub> O <sub>3</sub> | 13.80             | 25.96                  | 25.60              | 19.03     | 17.95            | 18.89    | 14.88                 | 12.31     | 12.16            | 18.04    | 18.09    | 17.34     | 18.67     | 15.35     | 21.33     | 15.10     | 16.58     |
| Pr <sub>2</sub> O <sub>3</sub> | 3.67              | 4.72                   | 4.71               | 4.36      | 4.11             | 4.38     | 3.87                  | 3.12      | 3.07             | 3.98     | 3.86     | 4.15      | 4.35      | 3.96      | 4.63      | 3.87      | 4.20      |
| Eu <sub>2</sub> O <sub>3</sub> | 0.22              | 0.68                   | 0.64               | 0.41      | 0.37             | 0.36     | 0.26                  | 0.07      | 0.12             | 0.13     | 0.14     | 0.33      | 0.38      | 0.26      | 0.44      | 0.30      | 0.28      |
| Sm <sub>2</sub> O <sub>3</sub> | 1.21              | 4.40                   | 4.06               | 2.42      | 2.16             | 2.19     | 1.33                  | 2.14      | 2.09             | 2.63     | 2.57     | 1.82      | 2.06      | 1.44      | 2.62      | 1.52      | 1.63      |
| Dy <sub>2</sub> O <sub>3</sub> | 0.08              | 0.42                   | 0.39               | 0.35      | 0.35             | 0.26     | 0.13                  | 0.40      | 0.38             | 0.50     | 0.52     | 0.24      | 0.24      | 0.20      | 0.22      | 0.21      | 0.16      |
| Er <sub>2</sub> O <sub>3</sub> | 0.00              | 0.06                   | 0.06               | 0.06      | 0.03             | 0.04     | 0.00                  | 0.08      | 0.05             | 0.06     | 0.08     | 0.05      | 0.04      | 0.03      | 0.06      | 0.01      | 0.03      |
| Gd <sub>2</sub> O <sub>3</sub> | 0.27              | 1.67                   | 1.41               | 0.71      | 0.67             | 0.59     | 0.34                  | 1.32      | 1.27             | 1.73     | 1.68     | 0.50      | 0.50      | 0.39      | 0.70      | 0.50      | 0.38      |
| Total                          | 99.08             | 101.14                 | 100.55             | 101.71    | 100.39           | 101.52   | 100.45                | 100.17    | 100.00           | 100.39   | 100.34   | 100.58    | 101.62    | 101.77    | 101.83    | 101.48    | 101.62    |
